# Supplementary material for: Expression-Guided In Silico Evaluation of Candidate Cis Regulatory Codes for Drosophila Muscle Founder Cells
Source: PLoS Comput Biol. 2006 May 26;2(5):e53. doi: 10.1371/journal.pcbi.0020053 (PMC1464814; doi:10.1371/journal.pcbi.0020053)
Supplement: Table S2 — (51 KB XLS) [file pcbi.0020053.st002.xls]

## Sheet: Best MF hits
Gene	Name	c1	PLE	Location	UCSC Genome Browser April 04 Assembly Coordinates	Score	Tcf	Mad	Ets	Twi	Tin
CG33529	Rapgap1	Y	N	inter	chr2L:7,560,647-7,562,564	-8.90729	(5,1,0)	(0,0,0)	(1,0,0)	(4,2,1)	(6,4,4)
CG10197	kn	Y	N	intra	chr2R:10,291,475-10,293,946	-9.85795	(3,1,1)	(0,0,0)	(6,2,1)	(8,6,5)	(6,1,1)
CG3340	Kr	Y	N	inter	chr2R:20,720,070-20,721,295	-6.0093	(0,0,0)	(0,0,0)	(2,2,1)	(3,2,1)	(3,1,1)
CG3758	esg	Y	N	inter	chr2L:15,322,543-15,324,520	-8.87156	(0,0,0)	(4,0,0)	(10,0,0)	(5,3,3)	(2,0,0)
CG32096	rols	Y	N	inter	chr3L:12,013,493-12,015,315	-9.45596	(1,0,0)	(0,0,0)	(4,0,0)	(4,1,1)	(8,6,5)
CG1921	sty	Y	Y	inter	chr3L:3,391,844-3,393,272	-7.93638	(3,0,0)	(0,0,0)	(3,0,1)	(6,3,3)	(2,0,0)
CG1225	RhoGEF3	Y	N	inter	chr3L:280,201-281,172	-6.27581	(2,0,0)	(0,0,0)	(5,0,0)	(5,0,0)	(3,0,0)
CG3839	l'sc	Y	Y	inter	chrX:262,124-263,166	-5.29659	(1,0,0)	(2,0,0)	(2,0,0)	(1,0,0)	(3,2,1)
CG6531	wgn	Y	Y	intra	chrX:18,460,351-18,462,679	-7.30038	(3,0,1)	(4,0,0)	(10,0,3)	(4,0,0)	(1,0,0)
CG3365	drongo	Y	Y	intra	chr2L:847,439-848,767	-7.22789	(1,1,0)	(2,1,0)	(4,2,0)	(1,0,1)	(2,1,0)
CG17492	mib2	Y	Y	intra	chr2L:19,032,900-19,033,843	-5.20363	(0,0,0)	(0,0,0)	(5,2,0)	(4,0,0)	(1,0,0)
CG12908	Ndg	Y	Y	intra	chr2R:5,827,214-5,828,627	-11.6224	(1,0,0)	(0,0,0)	(6,1,1)	(2,1,1)	(6,3,3)
CG10108	phyl	Y	Y	inter	chr2R:9,947,734-9,949,422	-6.93067	(1,0,0)	(1,0,0)	(5,0,0)	(4,4,2)	(3,0,0)
CG14207	CG14207	Y	Y	no hit
CG10250	nau	Y	Y	intra	chr3R:19,538,907-19,539,923	-5.52917	(1,0,0)	(0,0,0)	(4,0,0)	(2,0,0)	(3,2,2)
CG7223	htl	Y	N	inter	chr3R:13,875,203-13,876,891	-9.75922	(2,1,0)	(3,0,0)	(7,1,0)	(6,5,2)	(2,1,0)
CG4937	RhoGAP15B	Y	Y	no hit
CG6113	CG6113	Y	Y	inter	chr2L:10,522,432-10,524,729	-5.91106	(4,4,1)	(1,0,0)	(8,2,0)	(2,1,0)	(6,3,3)
CG3653	kirre	Y	N	inter	chrX:3,016,799-3,018,168	-8.10262	(1,1,0)	(0,0,0)	(2,0,0)	(6,1,0)	(4,3,1)
CG17952	CG17952	Y	N	inter	chr2R:17,257,266-17,259,567	-7.4326	(4,2,2)	(0,0,0)	(2,0,0)	(7,3,2)	(2,1,0)
CG31151	CG31151	Y	N	inter	chr3R:18,536,447-18,537,362	-7.59055	(1,1,1)	(0,0,0)	(2,2,0)	(2,2,2)	(2,0,0)
CG18250	Dg	Y	Y	inter	chr2R:11,588,188-11,590,041	-7.98787	(1,0,0)	(3,0,1)	(6,2,0)	(7,2,1)	(4,1,2)
CG7867	nuf	Y	Y	inter	chr3L:14,161,256-14,162,656	-7.21209	(1,0,0)	(1,0,0)	(1,0,0)	(6,4,1)	(5,1,0)
CG10275	CG10275	Y	Y	inter	chr2L:18,496,222-18,498,534	-10.0969	(2,1,1)	(3,0,0)	(7,3,1)	(1,1,1)	(8,5,3)
CG11202	Org-1	Y	N	intra	chrX:8,297,689-8,299,151	-9.34084	(3,1,0)	(2,2,0)	(2,0,0)	(2,0,0)	(5,4,2)
CG17871	Or71a	Y	N	no hit
CG4944	cib	Y	Y	inter	chrX:3,951,255-3,952,652	-9.35573	(0,0,0)	(5,2,0)	(2,1,0)	(5,0,0)	(1,0,0)
CG3166	aop	Y	Y	inter	chr2L:2,179,797-2,181,489	-8.0102	(2,0,0)	(2,0,0)	(6,5,1)	(5,0,0)	(3,2,0)
CG5295	CG5295	Y	N	no hit
CG8581	fra	Y	N	intra	chr2R:8,058,670-8,061,083	-9.44095	(2,1,1)	(3,0,0)	(10,3,1)	(6,3,1)	(3,0,1)
CG7004	fwd	Y	N	intra	chr3L:295,566-296,768	-5.74247	(0,0,0)	(2,0,0)	(4,0,0)	(3,1,0)	(4,0,0)
CG7892	nmo	Y	N	intra	chr3L:7,961,755-7,963,102	-9.43639	(2,0,0)	(0,0,0)	(4,0,0)	(5,0,2)	(4,0,1)
CG2328	eve	Y	Y	inter	chr2R:5,496,086-5,498,215	-20.1259	(3,2,1)	(5,0,0)	(16,6,1)	(2,1,0)	(7,3,2)
CG7958	tna	Y	N	inter	chr3L:10,821,896-10,823,282	-6.10511	(1,1,1)	(0,0,0)	(1,0,0)	(4,0,0)	(2,2,2)
CG33103	ppn	Y	Y	intra	chr3R:24,363,562-24,365,663	-11.1217	(5,2,2)	(0,0,0)	(10,1,1)	(5,5,3)	(8,5,4)
CG15319	nej	Y	N	inter	chrX:9,513,389-9,514,349	-5.58548	(0,0,0)	(0,0,0)	(5,0,0)	(4,0,0)	(1,0,0)
CG9461	CG9461	Y	N	inter	chr3R:5,635,536-5,637,869	-7.00558	(0,0,0)	(1,1,0)	(5,1,1)	(5,2,2)	(8,2,2)
CG14447	Grip	N	Y	intra	chrX:5,821,474-5,822,786	-6.83006	(4,0,0)	(2,1,0)	(4,0,1)	(2,0,0)	(2,0,0)
CG17278	CG17278	N	Y	no hit
CG17556	CG17556	N	Y	no hit
CG6520	CG6520	N	Y	no hit
CG8147	CG8147	N	Y	inter	chr3R:5,319,120-5,320,394	-6.26912	(2,0,0)	(2,0,0)	(5,2,0)	(1,0,0)	(2,1,0)
CG9139	CG9139	N	Y	no hit
CG9520	CG9520	N	Y	no hit

## Sheet: Regions tested
Gene	Name	MF score	UCSC Genome Browser April 04 Assembly Coordinates	Region tested	Forward Primer	Reverse Primer	c1	Results
cg6570	lbl	-13.9006	chr3R:17,249,312-17,253,051	chr3R:17251861-17253221	CGCAGAAAAACCAGATCAGTACG	ATCAGACCGCTCCGTCATAGG	N	co-expression in SBM FC
cg17492	mib2	-5.20363	chr2L:19,032,900-19,033,843	chr2L:19,032,925-19,033,670	CCAAGAGAGAACATTTCTTCAG	GCTATAGAGCTGCCACAAGG	Y	co-expression in FCs and VM
cg10108	phyl	-6.93067	chr2R:9,947,734-9,949,422	chr2R:9947863-9949314	TTCATTCAGCGATCAGAGCCTC	CGCAATTCGCCTTGCTTTG	Y	co-expression in FCs
cg12908	Ndg	-11.6224	chr2R:5,827,214-5,828,627	chr2R:5827449-5828090	GCTAAGCAGGAGTGAAGTATTTGATG	GGTGTACTCAAGGTGTTATTGAAAATG	Y	co-expression in FCs
cg3830	vg	-7.90885	chr2R:8,417,361-8,418,758	chr2R:8417235-8418556	GCGGAACAAATGGATGGATGAG	CGGTTGGTAAGCGGAGGAAAAG	N	co-expression in wing disc epithelial and adepithelial cells
cg6570	lbl	-13.9006	chr3R:17,249,312-17,253,051	chr3R:17248893-17250636	TGGACTTCGACTTGTTTATCCACAC	CGCCTTTAATTATAGTCCCACAATG	N	co-expression in heart
cg3048	traf1	-7.17306	chr2L:4,377,277-4,378,748	chr2L:4377183-4378600			N	lacZ+ cells are not traf1+
cg3956	sna	-7.17974	chr2L:15,464,396-15,466,374	chr2L:15464434-15465695			N	no detectable embryonic lacZ expression
cg6570/cg6545	lbl/lbe	-7.63984	chr3R:17,264,070-17,265,320	chr3R:17264324-17265128			N	no detectable embryonic lacZ expression
cg31151	cg31151	-7.59055	chr3R:18,536,447-18,537,362	chr3R:18536358-18537255			Y	no detectable embryonic lacZ expression
cg9554	eya	-8.04588	chr2L:6,542,333-6,543,730	chr2L:6542647-6543670			N	lacZ+ cells are not eya+
cg31317	stumps	-5.60563	chr3R:10,406,716-10,407,834	chr3R:10406993-10407975			N	lacZ+ cells are not stumps+
